# Supplementary material for: Spacer-enhanced chymotrypsin-activated peptide-functionalized gold nanoparticle probes: a rapid assay for the diagnosis of pancreatitis
Source: Royal Society of Chemistry journal article supplement (doi:10.1039/c4ra00258j), 2014-01-01
Supplement: c4ra00258j1.pdf [file c4ra00258j1.pdf]

## Supplementary Information

### **Spacer-enhanced chymotrypsin-activated peptide-functionalized gold nanoparticle probes: a rapid assay for the diagnosis of pancreatitis**

**Fang-Yuan Yeh<sup>1</sup>, I-Hua Tseng<sup>1</sup>, Shu-Hung Chuang<sup>1,2</sup>, Chih-Sheng Lin<sup>1,\*</sup>**

- 1. Department of Biological Science and Technology, National Chiao Tung University, Hsinchu, Taiwan*
- 2. Department of Surgery, Mackay Memorial Hospital, Hsinchu Branch, Hsinchu, Taiwan*

Correspondence should be addressed to Chih-Sheng Lin ([lincs@mail.nctu.edu.tw](mailto:lincs@mail.nctu.edu.tw)).

## **S1. Method of dithizone staining of islet**

The islet isolation of mouse pancreas and the staining procedure were modified from Li's protocol<sup>1</sup>. Dithizone (DTZ) was used to staining isolated pancreas. Stock DTZ solution was prepared as following procedure: 25 mg DTZ was added in 0.6 mL 95% ethanol and few drops of ammonium hydroxide were added for completely dissolving. After then the solution would turn bright orange solution. DTZ solution was prepared as following: added 0.6 mL stock DTZ solution to volumetric flask and added DPBS to final 50 mL. DTZ solution was adjusted to pH 7.4 with 1N HCl.

The isolated pancreas was digested using collagenase type I (0.5 mg/mL in DPBS, 1mL) for 2 h at 37°C. The solution would be exchanged once during digestion and re-poured with collagenase type I (1mL) for 2 h incubation at 37°C. Finally, the mixture processed with centrifugation ( $1,500 \times g$ , 5 min). Then poured the tissue to petri-dishes and stained with prepared DTZ solution. After 2 min staining, hand-pick the isolated islets to microscope slide and observed under microscope (BX 51; Olympus, Tokyo, Japan) and digitized using an attached MagnaFire<sup>TM</sup> imaging system (Olympus, Tokyo, Japan).

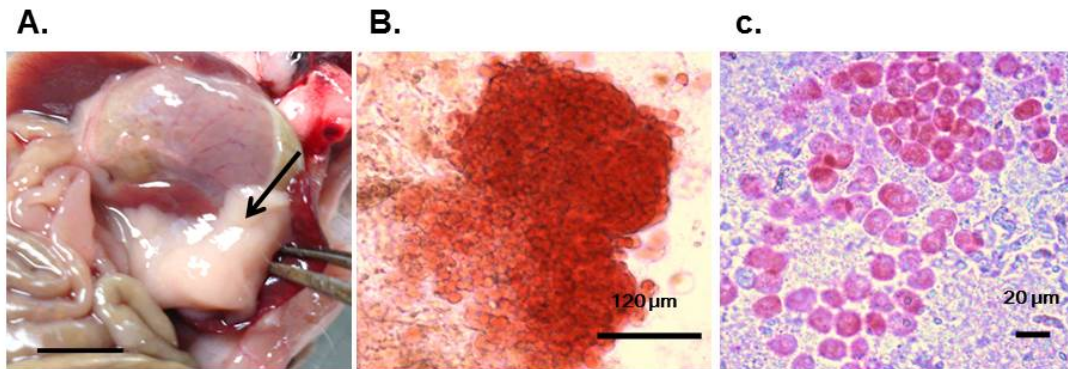

**Figure. S1.** (A) mouse pancreas indicated by the arrow; (B) staining islets and the size is about 250  $\mu\text{m}$  in diameter (scale bar in the photogram represents 120  $\mu\text{m}$ ); and (C) the beta-cells of islets stained by dithizone and the size is about 20  $\mu\text{m}$  in diameter (scale bar in the photogram represents 20  $\mu\text{m}$ ).

## **S2. UV-spectra of different stress tests**

### ***S2.1. Method of AuNPs pH stress test***

Citrate-capped AuNPs were adjusted to different pH with 1 N HCl or 1 N NaOH. Then the 100  $\mu$ L of pH adjusted AuNPs were diluted with 100  $\mu$ L ddH<sub>2</sub>O and the pH were confirmed as pH 4 to 11. The mixture was incubated for 30 min at room temperature. Then the total volume of 200  $\mu$ L mixture was loaded in micro plate for UV-Vis absorption measurement from 400 to 700 nm wavelengths within 1nm interval.

### ***S2.2. Method of AuNPs salt stress test***

Citrate-capped AuNPs and AuNPs-peptide probe were prepared. The salt stress assays were performed as AuNP or AuNPs-peptide probe with different concentrations of NaCl (100 to 3,000 mM). The mixture was incubated for 30 min at room temperature. Then the total volume of 200  $\mu$ L mixture was loaded in micro plate for UV-Vis absorption measurement from 400 to 700 nm wavelengths within 1nm interval.

### ***S2.3 Aggregation level of AuNPs***

Citrate-capped AuNPs is unstable which easy effect by ionic strength as shown in **Fig. S2B**. AuNPs aggregation could be observed a red shift in UV-spectra and an increase in absorption of longer wavelength at 625 nm. More specific aggregation level determination could be conducted by the parameter of  $A_{520}$  to  $A_{625}$  ratio<sup>2,3</sup>. The parameter of  $A_{520}$  to  $A_{625}$  ratio above 0.3 was defined as a serious aggregation level in this study. The pH of AuNPs has no effect in aggregation. For citrate-capped AuNPs, over 20 mM NaCl cause an obvious LSPR band shift and above 25 mM cause serious aggregation. For AuNPs-P2 probe without stabilizer, couldn't bear any salt. For AuNPs-P3 probe, could bear about 50 mM NaCl.

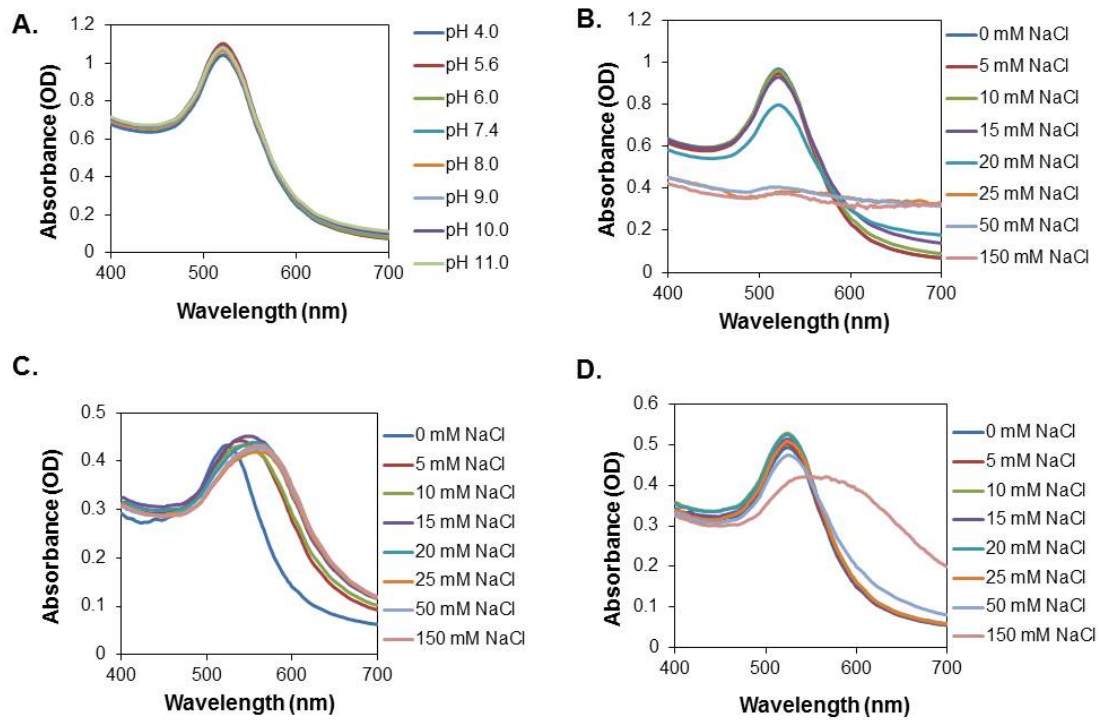

**Figure S2.** (A) Absorption spectra of citrate-capped AuNPs under different pH stress; absorption spectra of (B) citrate-capped AuNPs; (C) AuNPs-P2 probe; and (D) AuNPs-P3 probe under different salt stress.

### **S3. Establishment of mouse model of acute pancreatitis**

Acute pancreatitis (AP) could be induced by repeated cerulein injections and higher frequencies of cerulein injections will lead to rapid formation of pancreatic fibrosis <sup>4,5</sup>. AP is initiated in the acinar cells and the proteolytic enzymes play a crucial role by inducing pancreas auto-digestion. There are several evidences from experiment models suggested that premature activation of trypsinogen represents a critical indicating event that leads to acinar cell damages, tissue destruction, and self-digestion of the organ <sup>6,7</sup>.

The laboratory biochemical diagnosis of AP is using the plasma amylase and lipase levels which would increase over three-fold than the upper limit of the normal reference <sup>8</sup>. The plasma amylase of cerulein-induced group was significantly higher than that of in the saline group, which was over 6 and 12-fold in the 8<sup>th</sup> and 10<sup>th</sup> h scarified mice, respectively (**Fig. 5A**). Meanwhile, the plasma lipase of cerulein-induced group was significantly higher than that of in the saline group, which was over 4 and 6-fold in the 8<sup>th</sup> and 10<sup>th</sup> h scarified mice, respectively (**Fig. 5B**). The cerulein-induced AP results are corresponding to the previously established model that serum amylase was about 30,000 U L<sup>-1</sup> at the 7<sup>th</sup> h and the reference value was about 4,000 U L<sup>-1</sup> <sup>6</sup>. Precious works showed that cerulein-induced AP model could achieve maximal pancreatic injury at the 12<sup>th</sup> h and recover spontaneously after the 24<sup>th</sup> to 48<sup>th</sup> h <sup>4</sup>. The cerulein-induced AP mouse model established by Tsai et al. (2011) also showed the elevation of plasma amylase and lipase level in the 24<sup>th</sup> h and decreased in 30<sup>th</sup> h <sup>9</sup>. However, the plasma amylase and lipase are decreasing to normal level in the 24<sup>th</sup> h in this study. The amylase levels with pancreatitis depended on the severity of the diseases <sup>8</sup>. Van felius et al. (2003) indicated that cerulein administration induced mild pancreatitis and the

interval between injections was not frequently enough might lead to less severity <sup>10</sup>.  
Therefore, the decreases of amylase and lipase levels could conclude to mild AP  
induced in this model.

## References

1. D. S. Li, Y. H. Yuan, H. J. Tu, Q. L. Liang and L. J. Dai, *Nat. Protoc.*, 2009, 4, 1649-1652.
2. Y. C. Chuang, J. C. Li, S. H. Chen, T. Y. Liu, C. H. Kuo, W. T. Huang and C. S. Lin, *Biomaterials*, 2010, 31, 6087-6095.
3. Y. C. Chuang, W. T. Huang, P. H. Chiang, M. C. Tang and C. S. Lin, *Biosens. Bioelectron.*, 2012, 32, 24-31.
4. A. A. Aghdassi, J. Mayerle, S. Christochowitz, F. U. Weiss, M. Sandler and M. M. Lerch, *Fibrogenesis Tissue Repair*, 2011, 4.
5. D. Feng, O. Park, S. Radaeva, H. Wang, S. Yin, X. Kong, M. Zheng, S. Zakhar, J. K. Kolls and B. Gao, *Int. J. Biol. Sci.*, 2012, 8, 249-257.
6. A. Lugea, L. Nan, S. W. French, J. A. Bezerra, A. S. Gukovskaya and S. J. Pandol, *Gastroenterology*, 2006, 131, 885-899.
7. B. Baumann, M. Wagner, T. Aleksic, G. von Wichert, C. K. Weber, G. Adler and T. Wirth, *J. Clin. Invest.*, 2007, 117, 1502-1513.
8. A. Munoz and D. A. Katerndahl, *Am. Fam. Physician*, 2000, 62, 164.
9. M. Tsai, C. Chen, S.-H. Chen, Y. Huang and T. Chiu, *J Gastroenterol*, 2011, 46, 822-833.
10. I. D. Van felius, L. M. A. Akkermans, K. Bosscha, A. Verheem, W. Harmsen, M. R. Visser and H. G. Gooszen, *Neurogastroenterology Motil.*, 2003, 15, 267-276.
